# Supplementary material for: Linearity of Age at Cancer Onset Worldwide: 25-Year Population-Based Cancer Registry Study
Source: MDPI journal article supplement (doi:10.3390/cancers13215589), 2021-11-08
Supplement: s1 [file s1]

**Table S1: Linear regression between median age of the population as a predictor of the median age of the studied cancers according to the three selected main geographical areas recorded by the XI Cancer in Five Continents volumes (2008-12)**

| Cancer                     | Selected main geographical areas |      |       |             |                |      |       |              |                                  |      |        |               |
|----------------------------|----------------------------------|------|-------|-------------|----------------|------|-------|--------------|----------------------------------|------|--------|---------------|
|                            | Americas, Europe and Oceania     |      |       |             | Asia           |      |       |              | Eastern Mediterranean and Africa |      |        |               |
|                            | (N= 285 CRs)                     |      |       |             | (N= 84 CRs)    |      |       |              | (N= 24 CRs)                      |      |        |               |
|                            | r <sup>2</sup>                   | α    | Slope | (95%CI)     | r <sup>2</sup> | α    | Slope | (95%CI)      | r <sup>2</sup>                   | α    | Slope  | (95%CI)       |
| <b>Males</b>               |                                  |      |       |             |                |      |       |              |                                  |      |        |               |
| All sites, but skin        | 0.61+                            | 53.9 | 0.38* | (0.34;0.41) | 0.67+          | 45.8 | 0.53* | (0.45;0.61)  | 0.10                             | 53.0 | 0.30   | (0.08;0.68)   |
| Pharynx                    | 0.14+                            | 53.7 | 0.21* | (0.15;0.28) | 0.04           | 53.4 | 0.16  | (0.01;0.33)  | 0.06                             | 46.5 | 0.20   | (0.01;0.54)   |
| Oesophagus                 | 0.09+                            | 60.3 | 0.19* | (0.12;0.25) | 0.28+          | 53.7 | 0.32* | (0.21;0.44)  | 0.00                             | 63.9 | 0.03   | (0.36;0.41)   |
| Stomach                    | 0.53+                            | 52.6 | 0.47* | (0.42;0.52) | 0.51+          | 50.3 | 0.43* | (0.34;0.52)  | 0.03                             | 60.5 | 0.13   | (0.20;0.46)   |
| Liver                      | 0.31+                            | 50.4 | 0.43* | (0.36;0.51) | 0.14+          | 52.3 | 0.27* | (0.12;0.42)  | 0.03                             | 57.2 | 0.20   | (0.30;0.70)   |
| Pancreas                   | 0.41+                            | 56.1 | 0.35* | (0.30;0.40) | 0.58+          | 45.2 | 0.58* | (0.48;0.69)  | 0.03                             | 61.0 | 0.14   | (0.20;0.47)   |
| Colon and rectum           | 0.59+                            | 51.5 | 0.46* | (0.42;0.51) | 0.62+          | 46.1 | 0.52* | (0.43;0.61)  | 0.21                             | 51.1 | 0.38   | (0.07;0.70)   |
| Larynx                     | 0.09+                            | 59.7 | 0.15* | (0.10;0.21) | 0.34+          | 53.3 | 0.32* | (0.22;0.42)  | 0.04                             | 63.9 | -0.09  | (-0.28;0.09)  |
| Lung                       | 0.31+                            | 59.5 | 0.28* | (0.23;0.32) | 0.61+          | 52.0 | 0.45* | (0.37;0.53)  | 0.00                             | 65.3 | -0.04  | (-0.36;0.28)  |
| Prostate                   | 0.15+                            | 61.7 | 0.19* | (0.14;0.24) | 0.21+          | 66.6 | 0.19* | (0.11;0.26)  | 0.24                             | 75.9 | -0.19* | (-0.33;-0.05) |
| Testis                     | 0.20+                            | 25.9 | 0.24* | (0.18;0.29) | 0.05+          | 26.3 | 0.33* | (0.01;0.64)  | 0.01                             | 28.8 | 0.13   | (0.46;0.72)   |
| Bladder                    | 0.31+                            | 61.0 | 0.29* | (0.24;0.34) | 0.48+          | 55.4 | 0.38* | (0.30;0.47)  | 0.01                             | 64.4 | 0.05   | (0.24;0.34)   |
| Kidney                     | 0.54+                            | 47.1 | 0.50* | (0.45;0.54) | 0.46+          | 44.0 | 0.49* | (0.38;0.61)  | 0.29                             | 15.6 | 1.46*  | (0.51;2.40)   |
| Hodgkin lymphoma           | 0.10+                            | 24.9 | 0.42* | (0.27;0.57) | 0.35+          | 1.9  | 1.27* | (0.89;1.65)  | 0.13                             | 18.4 | 0.56   | (0.05;1.16)   |
| Non-Hodgkin lymphoma       | 0.54+                            | 40.3 | 0.66* | (0.59;0.73) | 0.62+          | 35.4 | 0.70* | (0.58;0.81)  | 0.46                             | 24.2 | 1.02*  | (0.56;1.48)   |
| Myeloma                    | 0.44+                            | 50.5 | 0.50* | (0.43;0.57) | 0.26+          | 48.9 | 0.46* | (0.29;0.63)  | 0.01                             | 65.0 | -0.07  | (-0.43;0.29)  |
| Leukaemias                 | 0.56+                            | 18.7 | 1.25* | (1.12;1.38) | 0.77+          | -9.5 | 1.68* | (1.48;1.87)  | 0.30                             | 8.9  | 1.40*  | (0.51;2.29)   |
| Ill-defined or unspecified | 0.51+                            | 49.7 | 0.60* | (0.53;0.66) | 0.42+          | 44.2 | 0.61* | (0.45;0.77)  | 0.07                             | 54.9 | 0.33   | (0.16;0.81)   |
| <b>Females</b>             |                                  |      |       |             |                |      |       |              |                                  |      |        |               |
| All sites, but skin        | 0.73+                            | 45.7 | 0.51* | (0.47;0.54) | 0.60+          | 37.2 | 0.62* | (0.51;0.73)  | 0.33                             | 41.5 | 0.49   | (0.30;0.79)   |
| Pharynx                    | 0.09+                            | 45.3 | 0.42* | (0.26;0.57) | 0.15+          | 45.2 | 0.32* | (0.16;0.49)  | 0.10                             | 41.6 | 0.34   | (0.01;0.77)   |
| Oesophagus                 | 0.20+                            | 51.8 | 0.50* | (0.38;0.61) | 0.54+          | 48.4 | 0.56* | (0.45;0.67)  | 0.00                             | 65.3 | 0.03   | (0.39;0.45)   |
| Stomach                    | 0.45+                            | 49.5 | 0.59* | (0.51;0.66) | 0.60+          | 39.7 | 0.69* | (0.57;0.82)  | 0.18                             | 51.2 | 0.43   | (0.05;0.81)   |
| Liver                      | 0.40+                            | 46.2 | 0.64* | (0.55;0.73) | 0.53+          | 43.6 | 0.63* | (0.50;0.76)  | 0.35                             | 48.7 | 0.62*  | (0.27;0.96)   |
| Pancreas                   | 0.44+                            | 57.6 | 0.41* | (0.36;0.47) | 0.48+          | 41.9 | 0.72* | (0.56;0.89)  | 0.45                             | 49.4 | 0.57*  | (0.31;0.83)   |
| Colon and rectum           | 0.66+                            | 48.3 | 0.58* | (0.53;0.62) | 0.76+          | 39.2 | 0.71* | (0.62;0.79)  | 0.41                             | 45.5 | 0.58*  | (0.29;0.87)   |
| Larynx                     | 0.05+                            | 57.1 | 0.19* | (0.09;0.28) | 0.19+          | 45.7 | 0.54* | (0.30;0.78)  | 0.03                             | 67.6 | -0.23  | (-0.78;0.32)  |
| Lung                       | 0.13+                            | 62.3 | 0.18* | (0.13;0.23) | 0.64+          | 47.6 | 0.54* | (0.45;0.62)  | 0.00                             | 65.4 | -0.04  | (-0.29;0.21)  |
| Breast                     | 0.63+                            | 46.1 | 0.39* | (0.35;0.42) | 0.33+          | 42.0 | 0.30* | (0.21;0.39)  | 0.18                             | 44.7 | 0.26*  | (0.03;0.49)   |
| Cervix uteri               | 0.08+                            | 43.3 | 0.20* | (0.12;0.28) | 0.03+          | 54.1 | -0.07 | (-0.28;0.25) | 0.00                             | 52.3 | -0.02  | (-0.28;0.25)  |
| Bladder                    | 0.12+                            | 62.0 | 0.29* | (0.20;0.38) | 0.46+          | 47.4 | 0.61* | (0.47;0.75)  | 0.12                             | 60.0 | 0.25   | (0.03;0.54)   |
| Kidney                     | 0.52+                            | 46.4 | 0.54* | (0.48;0.60) | 0.52+          | 22.2 | 1.06* | (0.84;1.28)  | 0.34                             | -0.5 | 1.85*  | (0.77;2.93)   |
| Hodgkin lymphoma           | 0.03+                            | 29.9 | 0.20* | (0.06;0.35) | 0.13+          | 18.7 | 0.61* | (0.26;0.96)  | 0.18                             | 19.7 | 0.40*  | (0.05;0.76)   |
| Non-Hodgkin lymphoma       | 0.56+                            | 42.6 | 0.63* | (0.56;0.70) | 0.60+          | 32.4 | 0.76* | (0.63;0.89)  | 0.51+                            | 20.7 | 1.21*  | (0.72;1.71)   |
| Myeloma                    | 0.49+                            | 50.9 | 0.51* | (0.45;0.57) | 0.37+          | 41.6 | 0.62* | (0.45;0.80)  | 0.27                             | 50.5 | 0.45*  | (0.14;0.76)   |
| Leukaemias                 | 0.60+                            | 16.5 | 1.27* | (1.15;1.39) | 0.75+          | -3.6 | 1.49* | (1.30;1.67)  | 0.50                             | -1.7 | 1.7*   | (0.99;2.40)   |
| Ill-defined or unspecified | 0.55+                            | 47.9 | 0.72* | (0.64;0.79) | 0.52+          | 35.9 | 0.85* | (0.67;1.03)  | 0.54+                            | 39.3 | 0.95*  | (0.58;1.33)   |

α: Intercept; CR: Cancer Registry;

r<sup>2</sup>: R-squared; slope: slope of the regression line; 95%CI: 95% Confidence Interval; +probability of F-test<0.01; \*p<0.01

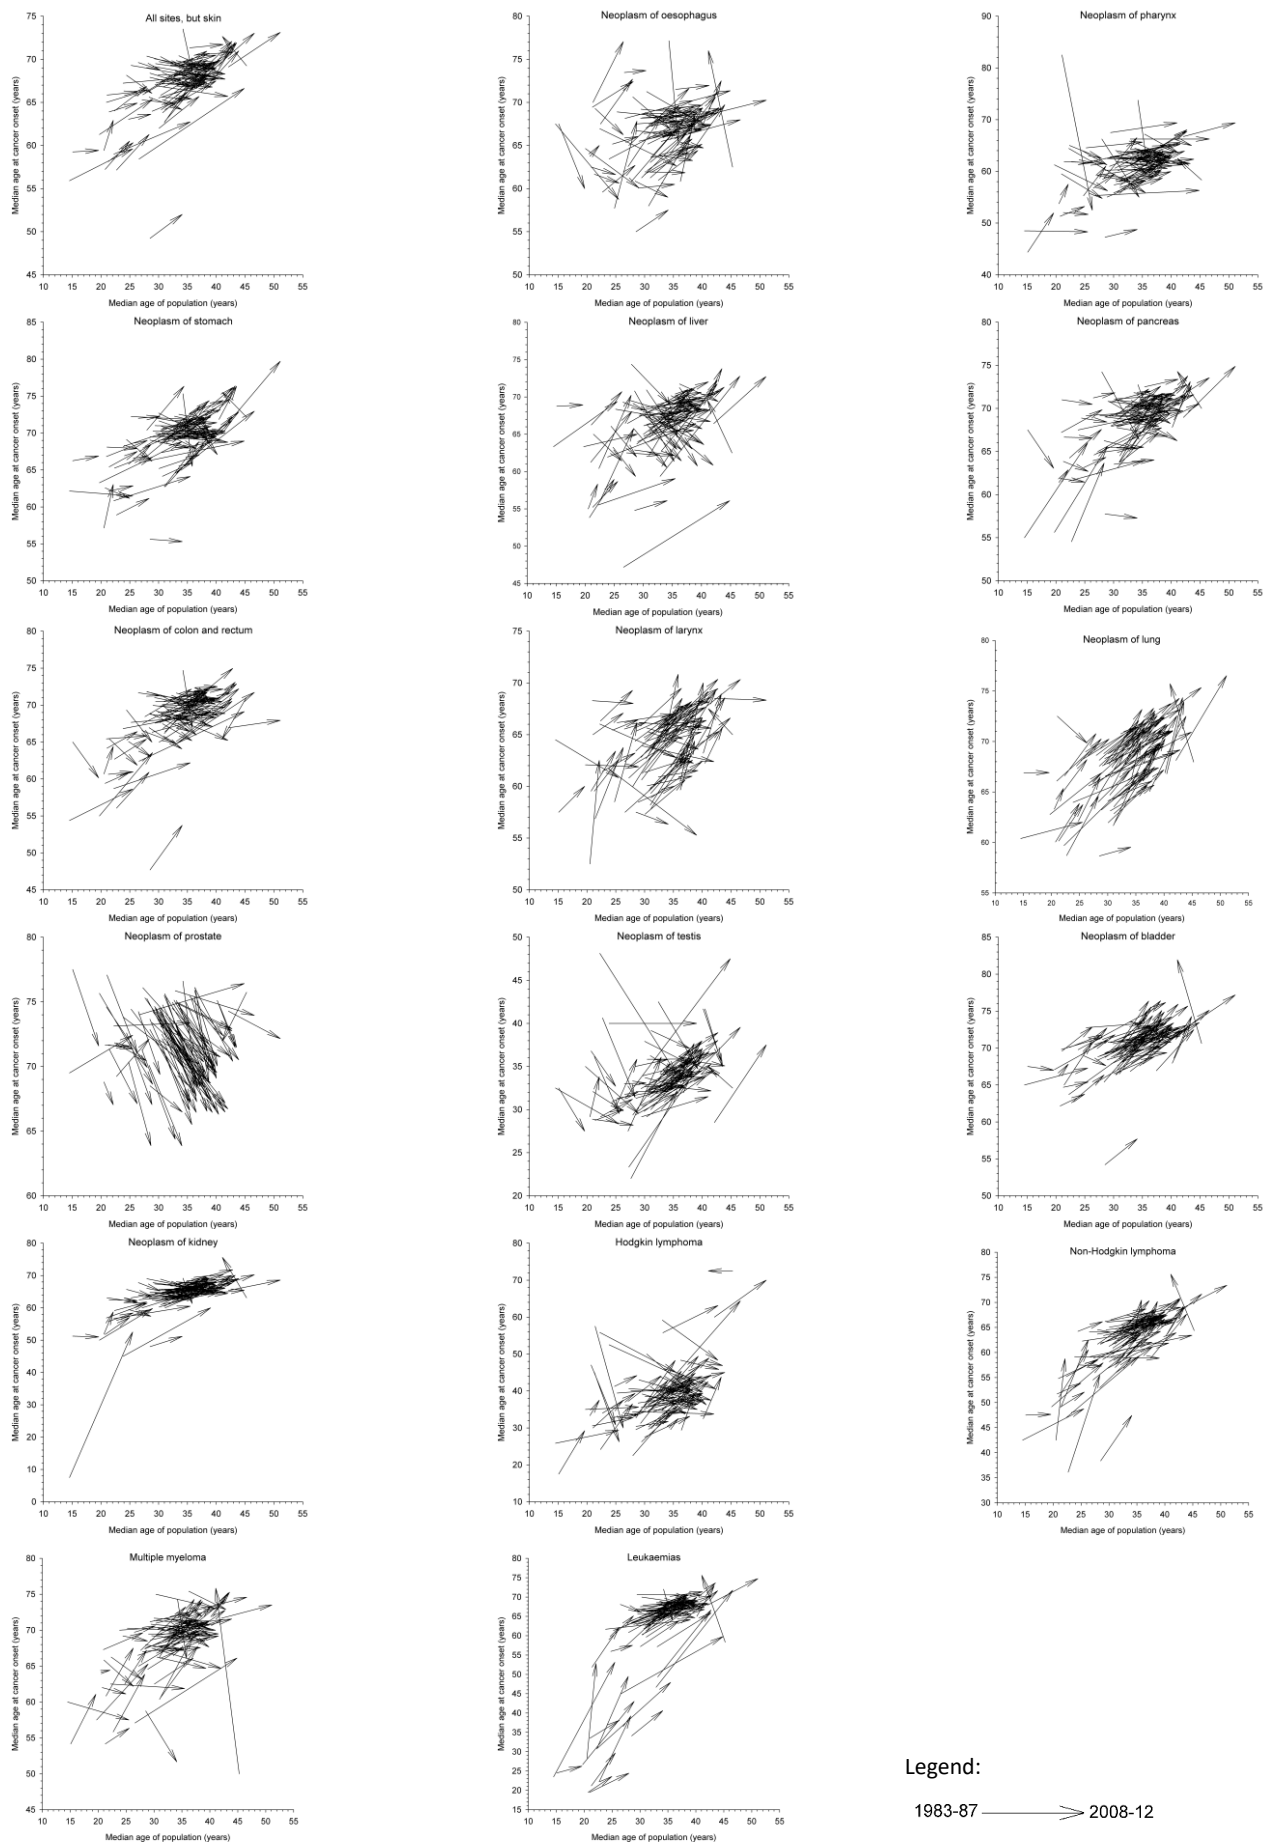

(a)

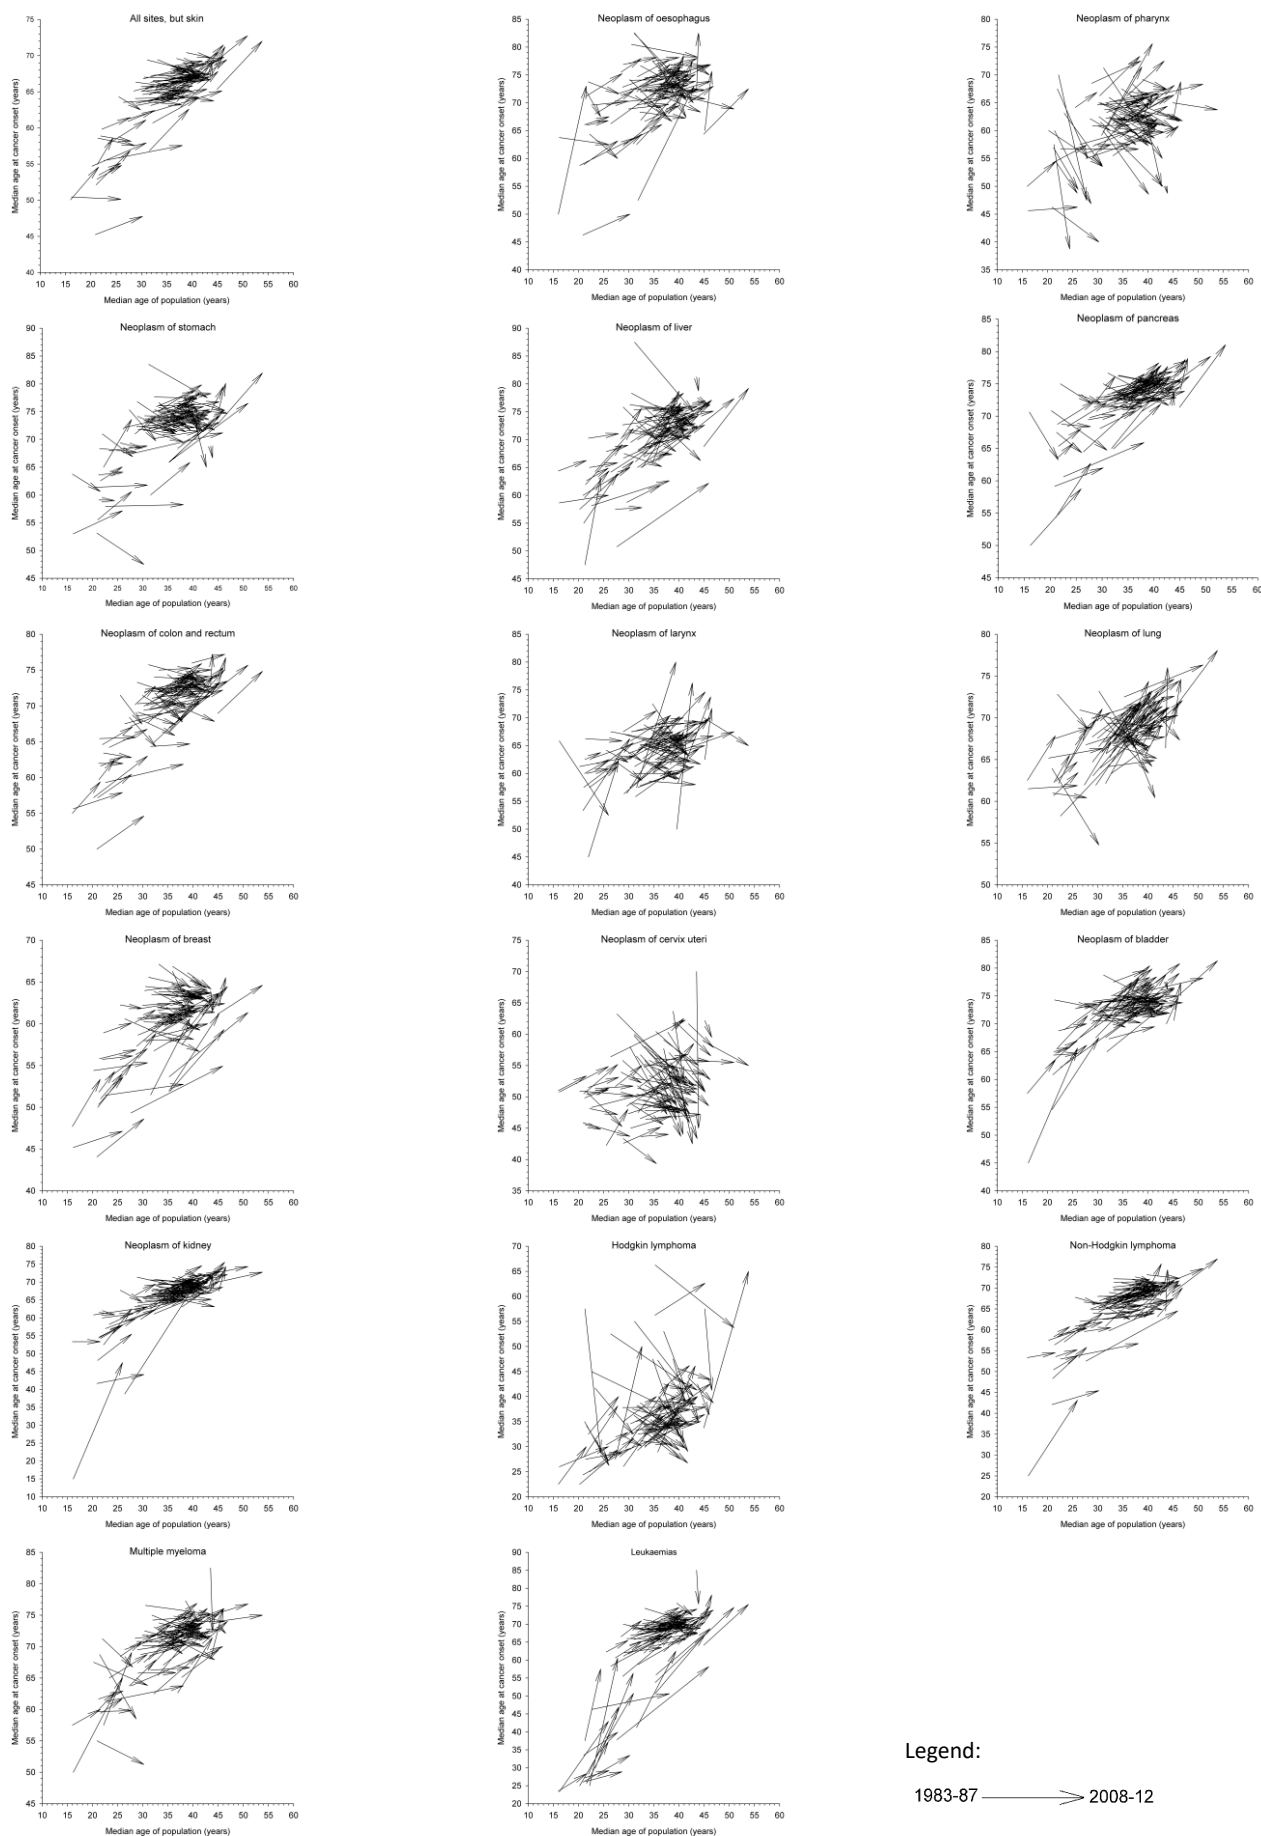

(b)

**Figure S1.** Vector plots of the median age of the population and the median age at cancer diagnosis at the beginning (1983-87) and at the end (2008-12) of the studied period in the 84 populations of the long-standing cancer registries (CRs) listed in the Cancer in Five Continents volumes. **(a)** Males; **(b)** Females.
